# Supplementary material for: Global distribution of soil organic carbon – Part 1: Masses and frequency distributions of SOC stocks for the tropics, permafrost regions, wetlands, and the world
Source: Copernicus journal article supplement (doi:10.5194/soil-1-351-2015), 2015-04-16
Supplement: Supplementary file 1 [file soil-1-351-2015-supplement-cover-letter.pdf › soil-1-351-2015-supplement-cover-letter.pdf]

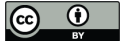

## *Supplement of*

# **Global distribution of soil organic carbon – Part 1: Masses and frequency distributions of SOC stocks for the tropics, permafrost regions, wetlands, and the world**

**M. Köchy et al.**

*Correspondence to:* M. Köchy ([office@martinkoechy.de](mailto:office@martinkoechy.de))

- [soil-1-351-2015-supplement-cover-letter.pdf](#)
- [R-script producing recoding tables for use by GRASS GIS.txt](#)
